# Supplementary material for: Metabolic routes affecting rubber biosynthesis in Hevea brasiliensis latex
Source: PubMed Central journal article supplement — J Exp Bot. 2011 Dec 7;63(5):1863–71. doi: 10.1093/jxb/err363 (PMC3295384; doi:10.1093/jxb/err363), 2011-12-07
Supplement: supp_err363_00070201-file005.pdf [file supp_err363_00070201-file005.pdf]

# **Metabolic Routes Affecting Rubber Biosynthesis in *Hevea brasiliensis* Latex**

Keng-See Chow, Mohd.-Noor Mat- Isa, Azlina Bahari, Ahmad-Kamal Ghazali, Halimah Alias,

Zainorlina Mohd.-Zainuddin, Chee-Choong Hoh, Kiew-Lian Wan

## **SUPPLEMENTARY DATA**

### **Gene abbreviations**

REF: rubber elongation factor; SRPP: small rubber particle protein; RBSP: rubber biosynthesis stimulator protein; RBIP: rubber biosynthesis inhibitor protein; FPPS: farnesyl diphosphate synthase; GGPPS: geranylgeranyl diphosphate synthase; IPPI: isopentenyl diphosphate isomerase; CPT: cis-prenyltransferase; HMGS: hydroxymethylglutaryl coenzyme A synthase; HMGR: hydroxymethylglutaryl coenzyme A reductase; MK: mevalonate kinase; PMK: phosphomevalonate kinase; DXS: 1-deoxy-D-xylulose 5-phosphate synthase; DXR: 1-deoxy-D-xylulose 5-phosphate reductoisomerase; 18S rRNA: 18S ribosomal RNA

**SUPPLEMENTARY FIGURE S1. qRT-PCR analysis of MVA and MEP pathway-specific gene transcript levels in RRIM 600 and PB 235.** Trend of gene expression based on transcript level (Pfaffl ratio) was consistent in two biological replicates of the same experiment (**a** and **b**). DXR was not included in one of the replicates (**b**) because of insufficient template RNA. The stable expression of the 18S rRNA gene in clones RRIM 600 and PB 235 was assessed by Student's t-test ( $P=0.79$ ). (CP=cycle threshold, Av: average; SD: standard deviation)

**a**

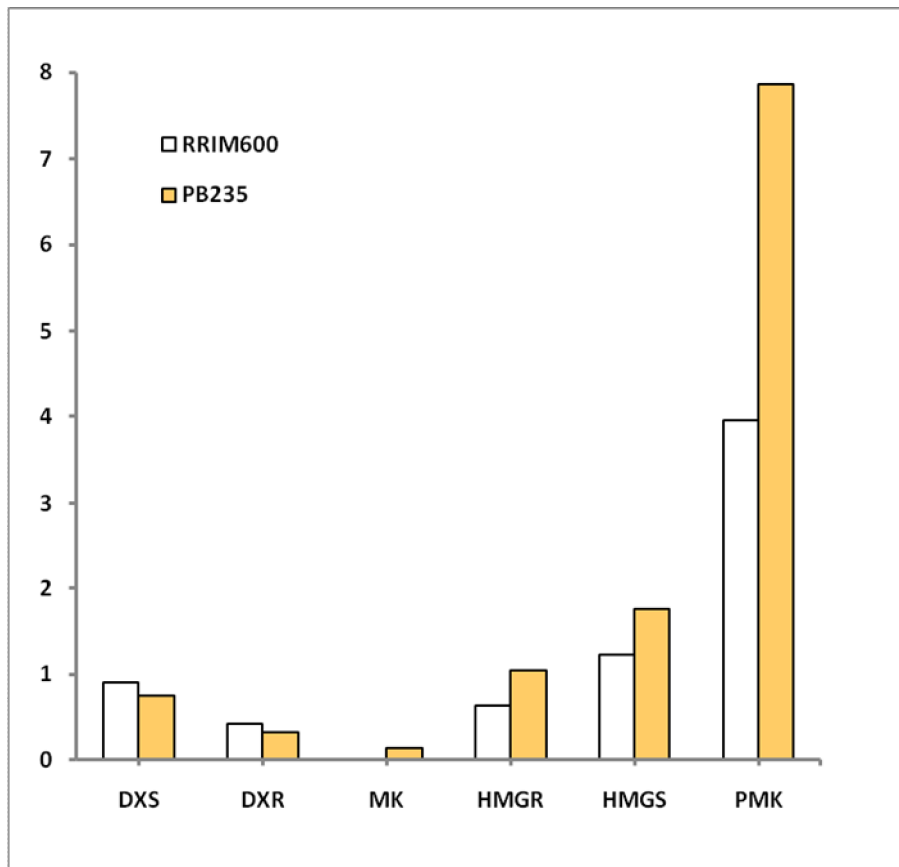

|             | RRIM 600   |                    | PB 235     |                    | P value<br>(Av Pfaffl ratio<br>RRIM 600 vs PB 235) |
|-------------|------------|--------------------|------------|--------------------|----------------------------------------------------|
|             | Av CP±SD   | Av Pfaffl ratio±SD | Av CP±SD   | Av Pfaffl ratio±SD |                                                    |
| <b>DXS</b>  | 16.53±0.07 | 0.91±0.05          | 16.37±0.14 | 0.75±0.08          | 0.0376                                             |
| <b>DXR</b>  | 17.53±0.49 | 0.42±0.13          | 18.23±0.59 | 0.32±0.11          | 0.3550                                             |
| <b>HMGR</b> | 17.21±0.46 | 0.63±0.21          | 16.04±0.52 | 1.05±0.34          | 0.1418                                             |
| <b>MK</b>   | 24.47±0.08 | 0.005±0.001        | 19.14±0.31 | 0.14±0.03          | 0.0017                                             |
| <b>HMGS</b> | 16.46±0.59 | 1.22±0.53          | 15.84±0.07 | 1.76±0.09          | 0.1546                                             |
| <b>PMK</b>  | 14.79±0.50 | 3.96±1.19          | 13.76±0.39 | 7.86±2.04          | 0.0461                                             |

**b**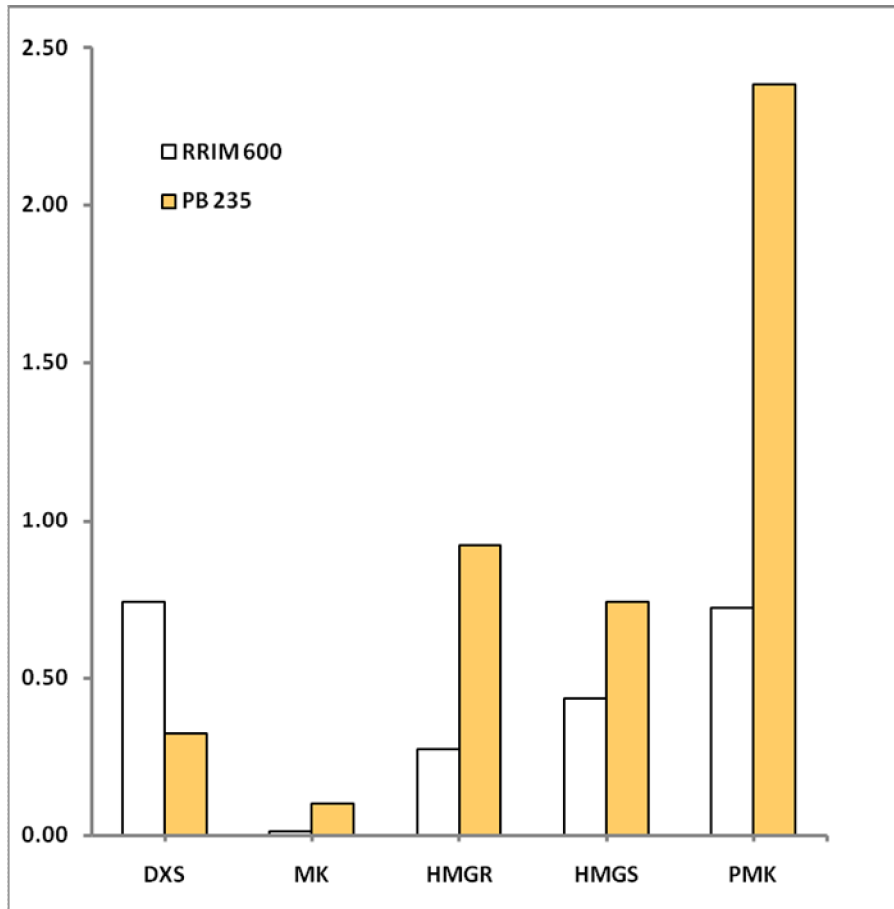

|             | RRIM 600   |                        | PB 235     |                        | P value<br>(Av Pfaffli ratio<br>RRIM 600 vs PB 235) |
|-------------|------------|------------------------|------------|------------------------|-----------------------------------------------------|
|             | Av CP±SD   | Av Pfaffli<br>ratio±SD | Av CP±SD   | Av Pfaffli<br>ratio±SD |                                                     |
| <b>DXS</b>  | 16.43±0.36 | 0.74±0.18              | 17.65±0.28 | 0.32±0.06              | 0.0201                                              |
| <b>HMGR</b> | 18.23±0.32 | 0.27±0.06              | 16.64±0.11 | 0.92±0.07              | 0.0003                                              |
| <b>MK</b>   | 23.07±0.18 | 0.01±0.00              | 20.02±0.15 | 0.10±0.01              | 0.0001                                              |
| <b>HMGS</b> | 17.77±0.32 | 0.43±0.10              | 17.29±0.36 | 0.74±0.18              | 0.0831                                              |
| <b>PMK</b>  | 17.11±0.07 | 0.72±0.04              | 15.65±0.11 | 2.38±0.18              | 0.0058                                              |

**SUPPLEMENTARY FIGURE S2. NG contig assembly and validation.** Illumina mRNAseq reads (35 nt) were first assembled using Velvet 0.7.63 with a hash value range of 15-31. Due to an inverse relationship between the hash values and total NG contigs, an arbitrary size limit of  $\times 100$  nt was introduced for total NG contigs generated by each hash value. This resulted in a distribution of contigs where the maximum number (29,751 NG contigs) coincided with hash 19. As further validation, mapping of NG contigs ( $\times 100$  nt) to 8,618 Sanger UTs also showed a distribution where the maximum number of hits (8,040) also peaked at hash 19. Therefore, this justified 29,751 NG contigs to be the optimal assembly of the Illumina mRNAseq reads.

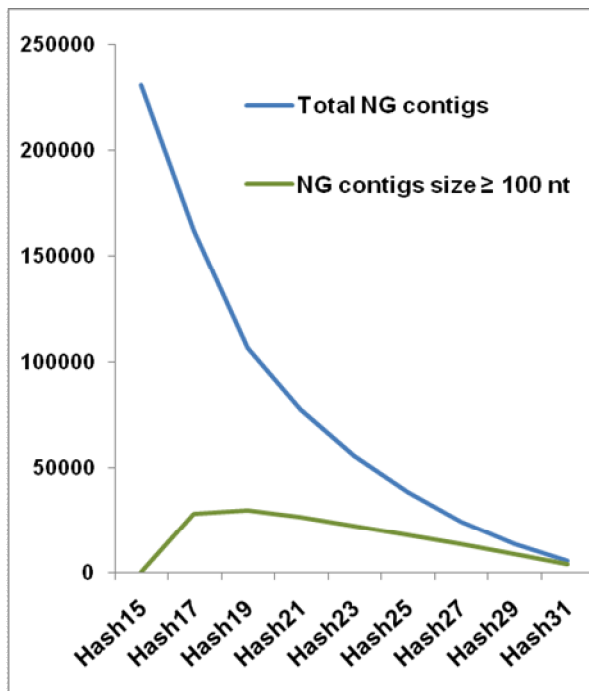

|               | Total NG contigs | NG contigs ( $\geq 100$ nt) | Hits by NG contigs ( $\geq 100$ nt) to 8,618 Sanger UTs |
|---------------|------------------|-----------------------------|---------------------------------------------------------|
| Hash15        | 231,008          | 241                         | 47                                                      |
| Hash17        | 162,103          | 28,118                      | 7,215                                                   |
| <b>Hash19</b> | <b>106,669</b>   | <b>29,751</b>               | <b>8,040</b>                                            |
| Hash21        | 77,462           | 26,278                      | 7,468                                                   |
| Hash23        | 55,539           | 22,230                      | 6,930                                                   |
| Hash25        | 38,268           | 17,971                      | 6,251                                                   |
| Hash27        | 24,137           | 13,438                      | 5,211                                                   |
| Hash29        | 13,413           | 8,568                       | 3,882                                                   |
| Hash31        | 5,487            | 4,144                       | 2,382                                                   |

**SUPPLEMENTARY FIGURE S3. Contig size distribution across three assembly data sets: Sanger UTs, NG contigs and hybrid contigs.** Based on the size distribution of Sanger UTs, NG contigs and hybrid contigs, there was an increase in assembly length in all size categories where the number of hybrid contigs was more than at least one of the initial data sets (Sanger UTs and NG contigs). Therefore, co-assembly resulted in overall contig size improvement in the hybrid contig population.

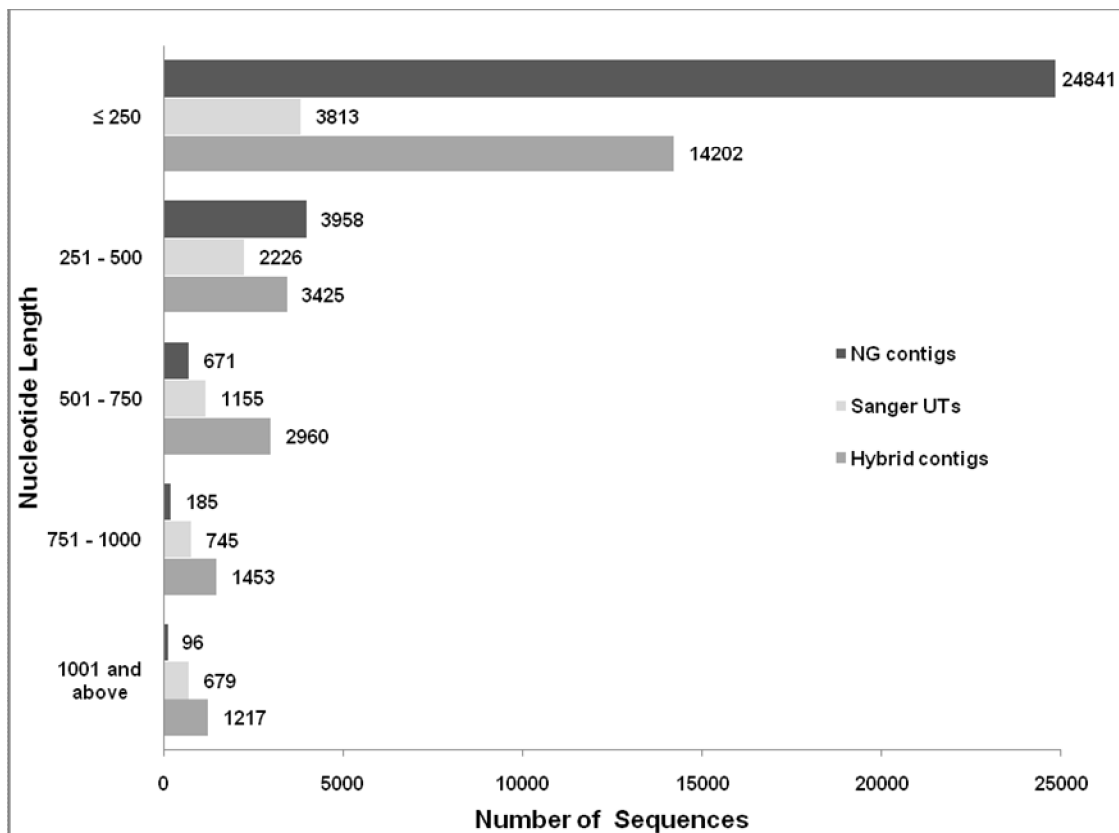

**SUPPLEMENTARY TABLE S1. qRT-PCR analysis of transcript levels of rubber biosynthesis pathway genes in ethylene-treated trees.** (a) Gene-specific primer pairs for qRT-PCR were designed based on publicly available *Hevea* cDNAs encoding candidate pathway genes (accession numbers indicated). Genes for post-IPP steps are italicised. (b) qRT-PCR analysis of latex samples collected on day 1, 3 and 8 after ethylene treatment. Gene transcript level was expressed as the Pfaffl ratio. DXR transcript level was not available in this data set because of unacceptable qRT-PCR results. The stable expression of the 18S rRNA as a housekeeping gene was assessed by Student's t-test which showed that the CP difference between latex sampled from different days ( $P=0.43$ ) and between ethylene treated and control untreated trees ( $P=0.11$ ) was not significant. (c) To account for day-to-day variation, comparison was made between transcript level of each gene in ethylene treated and control latex samples collected from the same day. In this comparison, a positive fold change indicated induction of transcription by ethylene while a negative fold change indicated repression. Four trends of fold change over three days are shown in Fig. 2. (CP=cycle threshold, Av: average; SD: standard deviation)

**a**

| Gene (Accession no.) | Amplicon (bp) | Forward (FW) and Reverse (RV) primer sequences                       | Primer pair efficiency | Annealing temperature (°C) |
|----------------------|---------------|----------------------------------------------------------------------|------------------------|----------------------------|
| 18S rRNA (AY496880)  | 110           | FW 5' CATAAACGATGCCGACCAG3'<br>RV 5' CAGCCTTGCGACCATACTC3'           | 1.98                   | 56.1<br>55.1               |
| GGPPS (AB055496)     | 156           | FW 5' AAGGCAATTCATTAACCAAGC3'<br>RV 5' AGTCATTCCCACCAACAAGC3'        | 2.00                   | 55.2<br>55.3               |
| SRPP (AF051317)      | 104           | FW 5' CTGGAGTTTATGCTGTAGATTC3'<br>RV 5' TCACCACATTCTCAATAGTATCG3'    | 2.08                   | 55.0<br>54.5               |
| RBIP (AF113546)      | 179           | FW 5' GATGCGAAATGTAATGCTCTG3'<br>RV 5' TAGTGCTAGTAGTGTAGGATTGG3'     | 2.00                   | 55.0<br>55.2               |
| MK (AF429384)        | 132           | FW 5' TCAAGTTCAAGTCTGGTAATCTG3'<br>RV 5' TGCCGTAAGTTCTCTCTG3'        | 2.00                   | 54.6<br>55.0               |
| PMK (AF429385)       | 138           | FW 5' CTGCTTTACTTCATCACCTTG3'<br>RV 5' AATCCACTGCCGACTTTCC3'         | 1.97                   | 55.4<br>55.4               |
| RBSP (AF516353)      | 132           | FW 5' CTGATGGTGAAACAGTCTTTATG3'<br>RV 5' CTCCCTCATTACAAGCCTTATC3'    | 1.96                   | 56.3<br>56.0               |
| HMGS (AY534617)      | 146           | FW 5' AGGTAAGCGGGTGATACTATTC3'<br>RV 5' GTGTCTTGTCTTCAACTTTCC3'      | 1.98                   | 54.6<br>55.3               |
| IPPI (AF111842)      | 192           | FW 5' ATGTAAATCCAAACCCTGATGAG3'<br>RV 5' AACTGCTTCCTTGAGTGCC3'       | 1.98                   | 55.1<br>54.7               |
| HMGR (X54659)        | 105           | FW 5' CTGTTATATGAAGTATGGAGATAGG3'<br>RV 5' AAGGGTAGAGAGAGAAGTAGAGG3' | 2.02                   | 55.1<br>55.2               |
| REF (X56535)         | 173           | FW 5' CAACTTATGCTGTGACTACCTTC3'<br>RV 5' GTGCTGTCTACAAACTTGAG3'      | 2.00                   | 54.9<br>54.5               |
| FPPS (Z49786)        | 169           | FW 5' CACCAGATCCCGTCAATG3'<br>RV 5' ATTCAATACACCAACCAAGAGC3'         | 1.99                   | 54.9<br>54.4               |
| CPT (AB061234)       | 126           | FW 5' CAAGACCGCAGCAGATAAG3'<br>RV 5' CAATTCAGAGGATTCTTCAACAG3'       | 2.03                   | 54.7<br>54.8               |
| DXS (EC609693)       | 130           | FW 5' AGTCTGCGTCCGTTATCCAAGG3'<br>RV 5' CCATACCAAGCAAAGCAACATC3'     | 2.03                   | 54.2<br>54.1               |
| DXR (DQ437514)       | 78            | FW 5' ATTGGACATCGTGGCAGAG3'<br>RV 5' CAAGAAGAGTAACATTTGAACC3'        | 2.00                   | 54.2<br>54.1               |

**b**

| Day 1 (control) |                  |                          | Day 1 (ethylene treated) |                  |                          |
|-----------------|------------------|--------------------------|--------------------------|------------------|--------------------------|
| Gene            | Av CP $\pm$ SD   | Av Pfaffl ratio $\pm$ SD | Gene                     | Av CP $\pm$ SD   | Av Pfaffl ratio $\pm$ SD |
| SRPP            | 5.46 $\pm$ 0.28  | 2848.86 $\pm$ 553.47     | SRPP                     | 4.98 $\pm$ 0.31  | 1778.57 $\pm$ 373.28     |
| REF             | 8.40 $\pm$ 0.10  | 237.17 $\pm$ 15.64       | REF                      | 6.50 $\pm$ 0.12  | 690.39 $\pm$ 59.95       |
| PMK             | 12.80 $\pm$ 0.57 | 20.35 $\pm$ 7.71         | RBIP                     | 11.66 $\pm$ 0.12 | 19.27 $\pm$ 1.66         |
| CPT             | 13.83 $\pm$ 0.18 | 10.41 $\pm$ 1.28         | CPT                      | 11.72 $\pm$ 0.18 | 15.60 $\pm$ 2.08         |
| RBSP            | 14.11 $\pm$ 0.24 | 5.21 $\pm$ 0.79          | FPPS                     | 12.98 $\pm$ 0.17 | 7.72 $\pm$ 0.90          |
| DXS             | 14.84 $\pm$ 0.49 | 2.16 $\pm$ 0.73          | PMK                      | 13.27 $\pm$ 0.22 | 7.08 $\pm$ 1.01          |
| FPPS            | 16.26 $\pm$ 0.34 | 1.67 $\pm$ 0.38          | RBSP                     | 13.92 $\pm$ 0.06 | 5.77 $\pm$ 0.24          |
| HMGS            | 17.03 $\pm$ 0.35 | 1.51 $\pm$ 0.34          | GGPPS                    | 13.48 $\pm$ 0.65 | 5.65 $\pm$ 2.74          |
| HMGR            | 17.36 $\pm$ 0.04 | 0.69 $\pm$ 0.02          | DXS                      | 14.30 $\pm$ 0.19 | 3.01 $\pm$ 0.42          |
| GGPPS           | 18.89 $\pm$ 0.46 | 0.37 $\pm$ 0.12          | HMGS                     | 14.72 $\pm$ 0.18 | 2.52 $\pm$ 0.31          |
| RBIP            | 18.45 $\pm$ 0.44 | 0.23 $\pm$ 0.07          | HMGR                     | 15.73 $\pm$ 0.20 | 0.99 $\pm$ 0.14          |
| IPPI            | 19.14 $\pm$ 0.20 | 0.16 $\pm$ 0.02          | IPPI                     | 16.18 $\pm$ 0.05 | 0.96 $\pm$ 0.03          |
| MK              | 20.07 $\pm$ 0.28 | 0.12 $\pm$ 0.02          | MK                       | 17.06 $\pm$ 0.20 | 0.45 $\pm$ 0.06          |

  

| Day 3 (control) |                  |                          | Day 3 (ethylene treated) |                  |                          |
|-----------------|------------------|--------------------------|--------------------------|------------------|--------------------------|
| Gene            | Av CP $\pm$ SD   | Av Pfaffl ratio $\pm$ SD | Gene                     | Av CP $\pm$ SD   | Av Pfaffl ratio $\pm$ SD |
| SRPP            | 7.66 $\pm$ 0.81  | 438.44 $\pm$ 207.60      | SRPP                     | 5.87 $\pm$ 0.22  | 2583.47 $\pm$ 420.65     |
| REF             | 8.46 $\pm$ 0.22  | 395.70 $\pm$ 56.80       | REF                      | 7.27 $\pm$ 0.43  | 774.84 $\pm$ 208.48      |
| CPT             | 12.21 $\pm$ 0.12 | 22.36 $\pm$ 1.92         | DXS                      | 14.03 $\pm$ 0.40 | 10.63 $\pm$ 3.20         |
| PMK             | 13.42 $\pm$ 0.27 | 10.21 $\pm$ 1.79         | PMK                      | 14.51 $\pm$ 0.08 | 9.86 $\pm$ 0.57          |
| DXS             | 13.53 $\pm$ 0.27 | 9.25 $\pm$ 1.72          | RBIP                     | 13.92 $\pm$ 0.40 | 7.71 $\pm$ 2.08          |
| FPPS            | 14.70 $\pm$ 0.05 | 3.79 $\pm$ 0.13          | CPT                      | 14.13 $\pm$ 0.36 | 7.06 $\pm$ 1.75          |
| RBIP            | 15.60 $\pm$ 0.13 | 2.79 $\pm$ 0.25          | FPPS                     | 15.42 $\pm$ 0.21 | 4.78 $\pm$ 0.66          |
| RBSP            | 16.21 $\pm$ 0.50 | 2.22 $\pm$ 0.79          | HMGS                     | 15.92 $\pm$ 0.10 | 2.64 $\pm$ 0.19          |
| HMGS            | 16.37 $\pm$ 0.19 | 1.61 $\pm$ 0.22          | RBSP                     | 17.16 $\pm$ 0.49 | 1.82 $\pm$ 0.56          |
| GGPPS           | 16.71 $\pm$ 0.43 | 1.15 $\pm$ 0.36          | IPPI                     | 16.53 $\pm$ 0.22 | 1.42 $\pm$ 0.23          |
| HMGR            | 17.43 $\pm$ 0.24 | 0.67 $\pm$ 0.11          | GGPPS                    | 17.03 $\pm$ 0.18 | 1.08 $\pm$ 0.13          |
| IPPI            | 19.62 $\pm$ 0.03 | 0.20 $\pm$ 0.00          | HMGR                     | 17.59 $\pm$ 0.34 | 0.73 $\pm$ 0.19          |
| MK              | 21.53 $\pm$ 0.30 | 0.04 $\pm$ 0.01          | MK                       | 19.75 $\pm$ 0.61 | 0.20 $\pm$ 0.09          |

  

| Day 8 (control) |                 |                          | Day 8 (ethylene treated) |                 |                          |
|-----------------|-----------------|--------------------------|--------------------------|-----------------|--------------------------|
| Gene            | Av CP $\pm$ SD  | Av Pfaffl ratio $\pm$ SD | Gene                     | Av CP $\pm$ SD  | Av Pfaffl ratio $\pm$ SD |
| SRPP            | 5.42 $\pm$ 0.39 | 8295.24 $\pm$ 2196.73    | SRPP                     | 5.64 $\pm$ 0.16 | 5502.96 $\pm$ 625.60     |
| REF             | 8.18 $\pm$ 0.32 | 1064.62 $\pm$ 251.72     | REF                      | 5.82 $\pm$ 0.14 | 3278.35 $\pm$ 306.67     |



|       |             |              |       |             |              |
|-------|-------------|--------------|-------|-------------|--------------|
| PMK   | 11.97± 0.64 | 63.62± 26.62 | RBIP  | 11.63± 0.38 | 59.43± 15.06 |
| CPT   | 12.84± 0.14 | 48.76± 5.01  | PMK   | 13.54± 0.51 | 30.05± 11.01 |
| FPPS  | 12.57± 0.50 | 38.68± 11.91 | CPT   | 12.47± 0.01 | 29.40± 0.24  |
| DXS   | 14.19± 0.69 | 19.83± 9.82  | FPPS  | 13.73± 0.10 | 23.16± 1.58  |
| RBIP  | 14.09± 0.30 | 17.64± 3.54  | DXS   | 15.21± 0.74 | 13.94± 4.33  |
| RBSP  | 15.63± 0.29 | 9.61± 1.91   | HMGS  | 15.85± 0.74 | 3.83± 1.85   |
| HMGS  | 16.45± 0.07 | 4.98± 0.25   | IPPI  | 16.00± 0.24 | 3.21± 0.52   |
| HMGR  | 16.18± 0.16 | 4.26± 0.45   | RBSP  | 17.59± 0.62 | 3.11± 1.23   |
| GGPPS | 16.98± 0.44 | 3.19± 1.03   | GGPPS | 16.38± 0.37 | 2.27± 0.59   |
| IPPI  | 18.23± 0.24 | 1.14± 0.19   | HMGR  | 17.78± 0.41 | 1.89± 0.54   |
| MK    | 19.12± 0.19 | 0.62± 0.08   | MK    | 22.55± 0.44 | 0.08± 0.03   |

**c**

| Trend | Gene  | Fold change in gene expression based on Pfaffl ratio of ethylene treated vs. control latex samples (P value) |                  |                  |
|-------|-------|--------------------------------------------------------------------------------------------------------------|------------------|------------------|
|       |       | Day 1                                                                                                        | Day 3            | Day 8            |
| I     | GGPPS | 15.3<br>(0.0290)                                                                                             | -0.9<br>(0.7673) | -0.7<br>(0.2506) |
|       | CPT   | 1.5<br>(0.0212)                                                                                              | -0.3<br>(0.0005) | -0.6<br>(0.0026) |
|       | RBSP  | 1.1<br>(0.3052)                                                                                              | -0.8<br>(0.5139) | -0.3<br>(0.0077) |
| II    | HMGR  | 1.4<br>(0.0213)                                                                                              | 1.1<br>(0.7212)  | -0.4<br>(0.0125) |
|       | MK    | 3.8<br>(0.0008)                                                                                              | 5.0<br>(0.0376)  | -0.1<br>(0.0031) |
|       | FPPS  | 4.6<br>(0.0128)                                                                                              | 1.3<br>(0.1402)  | -0.6<br>(0.1801) |
|       | DXS   | 1.4<br>(0.1851)                                                                                              | 1.1<br>(0.5465)  | -0.7<br>(0.3956) |
|       | HMGS  | 1.7<br>(0.0191)                                                                                              | 1.6<br>(0.0036)  | -0.8<br>(0.3305) |
| III   | SRPP  | -0.6<br>(0.0500)                                                                                             | 5.9<br>(0.0014)  | -0.7<br>(0.1932) |
|       | PMK   | -0.3<br>(0.0489)                                                                                             | 1.0<br>(0.8146)  | -0.5<br>(0.1308) |
| IV    | RBIP  | 83.8<br>(0.0006)                                                                                             | 2.8<br>(0.0153)  | 3.4<br>(0.0095)  |
|       | IPPI  | 6.0<br>(0.0001)                                                                                              | 7.1<br>(0.0057)  | 2.8<br>(0.0029)  |
|       | REF   | 2.9<br>(0.0002)                                                                                              | 2.0<br>(0.0384)  | 3.1<br>(0.0006)  |

**SUPPLEMENTARY TABLE S2. Interrogation of Sanger UTs, NG contigs and hybrid contigs with 195 annotated rubber cDNAs to obtain a measure of complete protein coding regions.** Each cross (+) indicates a match with a rubber cDNA. Our results showed that 80.5% of 195 complete rubber protein coding regions matched with the hybrid contigs, at the same time having a hit to at least one of the other two assembly data sets. This suggested that a large percentage of complete coding regions exist within the 23,257 hybrid contigs and thus provided evidence for biologically correct transcripts.

| Number of rubber cDNAs with hits | Assembly data set |            |                | Total (%)          |
|----------------------------------|-------------------|------------|----------------|--------------------|
|                                  | NG contigs        | Sanger UTs | Hybrid contigs |                    |
| 37                               | -                 | -          | -              | 37 (19.0)          |
| 24                               | -                 | +          | +              | 157 (80.5)         |
| 12                               | +                 | -          | +              |                    |
| 121                              | +                 | +          | +              | 1 (0.5)            |
| 1                                | +                 | +          | -              |                    |
|                                  |                   |            |                | <b>195 (100.0)</b> |

**SUPPLEMENTARY TABLE S3. List of 195 rubber cDNAs with complete protein coding regions, functional description and tissue of origin.** *(Provided as separate file)* Unlike high-throughput sequences which are analysed by bulk statistics, the 195 rubber cDNAs in the public databases represent more reliable protein coding regions as they had been curated manually. The reason why some rubber cDNAs did not match with any hybrid contig could be because they are sequence isoforms from non-latex tissues.

**SUPPLEMENTARY TABLE S4. Hybrid contig sequences in fasta format.** *Provided as separate file.*

**SUPPLEMENTARY TABLE S5. BLAST2GO annotations of hybrid contigs.** *(Provided as separate file.)* Putative gene functions and pathways of hybrid contigs are based on BLAST2GO and KEGG Pathway.
